# Supplementary material
Source: PubMed Central journal article supplement (PMC7362999)
Supplement: NIHMS1606114-supplement-Supplemental_File.pdf [file NIHMS1606114-supplement-Supplemental_File.pdf]

## **APPENDIX TEXT**

### **Piloting Social Determinants of Health Screening Within the Health System**

Prior to the implementation of the social determinants of health (SDH) screening program described in the current paper, a 2-year process was completed that involved a multi-disciplinary workgroup assessing existing internal and external screening tools, conducting a pre-pilot where the two selected tools were evaluated by a Patient Advisory Group, and the formal implementation of two screening tools from March 2017 to March 2018. One tool, hereafter referred to as the stressor screener, was an internal 11-item tool adapted from one created by the Montefiore Community Pediatrics Program. This tool had previously been validated against PHQ-4, a four-item screener for anxiety and depression, and asks respondents the amount of stress a particular risk/issue was causing them, with a three-level response option: “none,” “some,” or “a lot.” The second selected tool, hereafter referred to as the SDH screener, was modified from the 2016 Health Leads Social Needs Screening Toolkit, which included eight primary questions and two follow-up questions in “yes”/“no” format.

The pilot process included formalizing workflows for screening and implementing the tools into Epic to facilitate population-based analytics and reporting. Both screeners were available in English and Spanish during the pilot period.

During the pilot period 18,964 unique patients were screened (17,380 completed the SDH screener, and 1,584 completed the stressor screener). The stressor tool was used by five sites, and 54.0% of patients indicated “some” or “a lot of” stress due to one or more of the questions;

**Appendix**  
**Social Risks Among Primary Care Patients in a Large Urban Health System**  
**Heller et al.**

13.9% indicated “a lot” to one or more of the questions. The SDH screener was used by 18 sites, and 21.2% of patients reported issues with one or more of the seven items.

To assess the criterion validity of the SDH screener, the association between the number of social risks identified through the screener with outcomes known to have an association with SDH, including obesity, smoking, diabetes, asthma, and the number of emergency department visits in the past year, was examined. These results indicated that those with more social risks were significantly more likely to have each outcome, except obesity (only significant for women, but not men), which supports the use of the tool to capture social risks.

Following the pilot period, a final ten-item tool was developed based on the SDH screener and supplemented by questions from the stressor tool. The final tool was available in nine languages and was integrated into Epic.

**Appendix**  
**Social Risks Among Primary Care Patients in a Large Urban Health System**  
**Heller et al.**

**Appendix Table 1.** Characteristics of Patients Who Completed and Declined the Screener, April–December 2018

| <b>Characteristic</b>     | <b>Completed,<br/>%(n=24,633)</b> | <b>Declined,<br/>%(n=1,442)</b> | <b>p-value<sup>a</sup></b> |
|---------------------------|-----------------------------------|---------------------------------|----------------------------|
| Total                     | 100.0                             | 100.0                           |                            |
| <b>Age, years</b>         |                                   |                                 |                            |
| 0–5                       | 19.8                              | 6.9                             | <b>&lt;0.001***</b>        |
| 6–11                      | 12.3                              | 5.4                             | <b>&lt;0.001***</b>        |
| 12–17                     | 9.8                               | 6.7                             | <b>&lt;0.001***</b>        |
| 18–29                     | 11.4                              | 9.3                             | <b>0.016*</b>              |
| 30–39                     | 7.9                               | 8.7                             | 0.293                      |
| 40–49                     | 8.4                               | 11.7                            | <b>&lt;0.001***</b>        |
| 50–59                     | 10.8                              | 15.6                            | <b>&lt;0.001***</b>        |
| 60–69                     | 10.0                              | 16.8                            | <b>&lt;0.001***</b>        |
| ≥70                       | 9.6                               | 18.9                            | <b>&lt;0.001***</b>        |
| <b>Sex</b>                |                                   |                                 |                            |
| Male                      | 41.3                              | 42.9                            | 0.239                      |
| Female                    | 58.7                              | 57.1                            | 0.239                      |
| <b>Race/ethnicity</b>     |                                   |                                 |                            |
| Hispanic                  | 50.4                              | 48.8                            | 0.320                      |
| NHB                       | 41.3                              | 39.2                            | 0.189                      |
| NHW                       | 5.5                               | 8.3                             | <b>&lt;0.001***</b>        |
| NHAPI                     | 2.3                               | 3.3                             | <b>0.034*</b>              |
| NHAIAN                    | 0.5                               | 0.4                             | 0.509                      |
| Missing                   | —                                 | —                               |                            |
| <b>Preferred language</b> |                                   |                                 |                            |
| English                   | 83.5                              | 79.4                            | <b>&lt;0.001***</b>        |
| Spanish                   | 13.8                              | 16.8                            | <b>0.001**</b>             |
| Other                     | 2.7                               | 3.8                             | <b>0.019*</b>              |
| Missing                   | —                                 | —                               |                            |
| <b>Insurance status</b>   |                                   |                                 |                            |
| Medicaid                  | 50.9                              | 41.4                            | <b>&lt;0.001***</b>        |
| Medicare                  | 15.8                              | 29.1                            | <b>&lt;0.001***</b>        |
| Commercial                | 33.3                              | 29.4                            | <b>0.003**</b>             |
| Missing                   | —                                 | —                               |                            |

*Note:* Boldface indicates statistical significance (\* $p < 0.05$ , \*\* $p < 0.01$ , \*\*\* $p < 0.001$ ).

<sup>a</sup>Tested for differences in the two populations using proportion tests.

NHB, non-Hispanic black; NHW, non-Hispanic white; NHAPI, non-Hispanic Asian/Pacific Islander; NHAIAN, non-Hispanic American Indian/Alaskan Native.

**Appendix**  
**Social Risks Among Primary Care Patients in a Large Urban Health System**  
Heller et al.

**Appendix Table 2.** Screening Practices by Clinic, April–December 2018

| <b>Clinic<sup>a</sup> and population screened<sup>a</sup></b> | <b>Departments<sup>a</sup></b>                 | <b>Risk<sup>b</sup></b> | <b>N screened<sup>c</sup></b> | <b>Unique patients seen,<sup>d</sup> n</b> | <b>Proportion of eligible patients screened</b> |
|---------------------------------------------------------------|------------------------------------------------|-------------------------|-------------------------------|--------------------------------------------|-------------------------------------------------|
| Clinic A                                                      | Pediatrics                                     |                         |                               |                                            |                                                 |
| Children                                                      |                                                | High                    | 115                           | 4,087                                      | 2.8%                                            |
| Clinic B                                                      | Pediatrics, internal medicine                  |                         |                               |                                            |                                                 |
| Children                                                      |                                                | Normal                  | 270                           | 9,652                                      | 2.8%                                            |
| Adults                                                        |                                                | Normal                  | 1,769                         | 21,051                                     | 8.4%                                            |
| Clinic C                                                      | Pediatrics, family medicine, internal medicine |                         |                               |                                            |                                                 |
| Children                                                      |                                                | Normal                  | 51                            | 1,534                                      | 3.3%                                            |
| Adults                                                        |                                                | Normal                  | 2,136                         | 2,818                                      | 75.8%                                           |
| Clinic D                                                      | Pediatrics, internal medicine                  |                         |                               |                                            |                                                 |
| Children                                                      |                                                | Normal                  | 1,284                         | 4,163                                      | 30.8%                                           |
| Adults                                                        |                                                | High                    | 1,051                         | 7,466                                      | 14.1%                                           |
| Clinic E                                                      | Internal medicine                              |                         |                               |                                            |                                                 |
| Adults                                                        |                                                | Normal                  | 1,604                         | 3,391                                      | 47.3%                                           |
| Clinic F                                                      | Pediatrics, internal medicine                  |                         |                               |                                            |                                                 |
| Children                                                      |                                                | Normal                  | 1,732                         | 8,704                                      | 19.9%                                           |
| Adults                                                        |                                                | Normal                  | 3,851                         | 7,266                                      | 53.0%                                           |
| Clinic G                                                      | Pediatrics                                     |                         |                               |                                            |                                                 |
| Children                                                      |                                                | Normal                  | 3,771                         | 6,637                                      | 56.8%                                           |

**Appendix**  
**Social Risks Among Primary Care Patients in a Large Urban Health System**  
**Heller et al.**

|          |                                                |        |       |        |       |
|----------|------------------------------------------------|--------|-------|--------|-------|
| Clinic H | Internal medicine                              |        |       |        |       |
| Adults   |                                                | High   | 116   | 5,558  | 2.1%  |
| Clinic I | Pediatrics, internal medicine                  |        |       |        |       |
| Children |                                                | Normal | 152   | 2,349  | 6.5%  |
| Adults   |                                                | Normal | 190   | 5,847  | 3.2%  |
| Clinic J | Pediatrics, internal medicine                  |        |       |        |       |
| Children |                                                | Normal | 280   | 9,722  | 2.9%  |
| Adults   |                                                | High   | 629   | 9,811  | 6.4%  |
| Clinic K | Family medicine                                |        |       |        |       |
| Children |                                                | Normal | 52    | 2,795  | 1.9%  |
| Adults   |                                                | Normal | 282   | 8,613  | 3.3%  |
| Clinic L | Pediatrics                                     |        |       |        |       |
| Children |                                                | Normal | 146   | 5,463  | 2.7%  |
| Clinic M | Pediatrics                                     |        |       |        |       |
| Children |                                                | Normal | 692   | 1,680  | 41.2% |
| Clinic N | Pediatrics, internal medicine                  |        |       |        |       |
| Children |                                                | Normal | 2,348 | 4,784  | 49.1% |
| Adults   |                                                | Normal | 356   | 10,539 | 3.4%  |
| Clinic O | Pediatrics, family medicine, internal medicine |        |       |        |       |
| Children |                                                | Normal | 172   | 2,718  | 6.3%  |
| Adults   |                                                | Normal | 490   | 4,819  | 10.2% |

**Appendix**  
**Social Risks Among Primary Care Patients in a Large Urban Health System**  
**Heller et al.**

|          |                                    |        |     |       |       |
|----------|------------------------------------|--------|-----|-------|-------|
| Clinic P | Family medicine                    |        |     |       |       |
| Children |                                    | Normal | 34  | 769   | 4.4%  |
| Adults   |                                    | Normal | 388 | 1,798 | 21.6% |
| Clinic Q | Internal medicine                  |        |     |       |       |
| Adults   |                                    | High   | 143 | 4,589 | 3.1%  |
| Clinic R | Family medicine                    |        |     |       |       |
| Children |                                    | Normal | 18  | 1,349 | 1.3%  |
| Adults   |                                    | Normal | 148 | 2,761 | 5.4%  |
| Clinic S | Family medicine, internal medicine |        |     |       |       |
| Children |                                    | High   | 19  | 1,803 | 1.1%  |
| Adults   |                                    | High   | 320 | 7,444 | 4.3%  |

<sup>a</sup>Only included if screened  $\geq 10$  patients.

<sup>b</sup>Risk determined by screening practices at the departmental-level; higher-risk refers to clinics that screened patients who were recently discharged, had recent emergency department visits or were social work patients, for example.

<sup>c</sup>Does not add up to 24,633 because we excluded clinics and age categories that screened  $< 10$  patients.

<sup>d</sup>Defined as all primary care patients screened by participating clinics between April and December 2018.

**Appendix**  
**Social Risks Among Primary Care Patients in a Large Urban Health System**  
**Heller et al.**

**Appendix Table 3.** Characteristics of Montefiore Patients, April–December 2018, Screened, Comparison and Weighted Analyses

| Characteristic            | Screened population |                   | Comparison population, <sup>a</sup> %<br>(n=205,145) | Age, race/ethnicity, insurance weighted % <sup>b</sup> |
|---------------------------|---------------------|-------------------|------------------------------------------------------|--------------------------------------------------------|
|                           | n                   | %                 |                                                      |                                                        |
| Total                     | 24,633              | 100.0             | 100.0                                                | —                                                      |
| <b>Age, years</b>         |                     |                   |                                                      |                                                        |
| 0–5                       | 4,884               | 19.8 (19.3, 20.3) | <b>13.5*** (13.3, 13.6)</b>                          | 13.5                                                   |
| 6–11                      | 3,036               | 12.3 (11.9, 12.7) | <b>10.8*** (10.7, 10.9)</b>                          | 10.8                                                   |
| 12–17                     | 2,415               | 9.8 (9.4, 10.2)   | <b>9.2** (9.1, 9.3)</b>                              | 9.2                                                    |
| 18–29                     | 2,798               | 11.4 (11.0, 11.8) | <b>10.8* (10.7, 11.0)</b>                            | 10.8                                                   |
| 30–39                     | 1,945               | 7.9 (7.6, 8.2)    | <b>8.4** (8.3, 8.5)</b>                              | 8.8                                                    |
| 40–49                     | 2,063               | 8.4 (8.0, 8.7)    | <b>9.6*** (9.5, 9.7)</b>                             | 9.2                                                    |
| 50–59                     | 2,656               | 10.8 (10.4, 11.2) | <b>13.5*** (13.4, 13.7)</b>                          | 13.7                                                   |
| 60–69                     | 2,461               | 10.0 (9.6, 10.4)  | <b>12.4*** (12.2, 12.5)</b>                          | 12.2                                                   |
| ≥70                       | 2,375               | 9.6 (9.3, 10.0)   | <b>11.8*** (11.7, 11.9)</b>                          | 11.8                                                   |
| <b>Sex</b>                |                     |                   |                                                      |                                                        |
| Male                      | 10,172              | 41.3 (40.7, 41.9) | <b>39.9*** (39.7, 40.1)</b>                          | 40.4                                                   |
| Female                    | 14,461              | 58.7 (58.1, 59.3) | <b>60.1*** (59.9, 60.3)</b>                          | 59.6                                                   |
| <b>Race/ethnicity</b>     |                     |                   |                                                      |                                                        |
| Hispanic                  | 8,671               | 50.4 (49.7, 51.2) | <b>48.9*** (48.6, 49.1)</b>                          | 48.9                                                   |
| NHB                       | 7,103               | 41.3 (40.6, 42.0) | <b>40.3* (40.1, 40.6)</b>                            | 40.4                                                   |
| NHW                       | 944                 | 5.5 (5.2, 5.8)    | <b>7.5*** (7.4, 7.7)</b>                             | 7.5                                                    |
| NHAPI                     | 393                 | 2.3 (2.1, 2.5)    | <b>2.8** (2.7, 2.9)</b>                              | 2.7                                                    |
| NHAIAN                    | 92                  | 0.5 (0.4, 0.7)    | 0.5 (0.5, 0.5)                                       | 0.5                                                    |
| Missing                   | 7,430               | —                 | —                                                    | —                                                      |
| <b>Preferred language</b> |                     |                   |                                                      |                                                        |
| English                   | 19,804              | 83.5 (83.0, 83.9) | <b>82.0*** (81.9, 82.2)</b>                          | 83.2                                                   |
| Spanish                   | 3,274               | 13.8 (13.4, 14.2) | <b>14.9*** (14.8, 15.1)</b>                          | 14.3                                                   |
| Other                     | 651                 | 2.7 (2.5, 3.0)    | <b>3.0* (2.9, 3.1)</b>                               | 2.5                                                    |
| Missing                   | 904                 | —                 | —                                                    | —                                                      |
| <b>Insurance status</b>   |                     |                   |                                                      |                                                        |

**Appendix**  
**Social Risks Among Primary Care Patients in a Large Urban Health System**  
**Heller et al.**

|                                              |        |                   |                             |      |
|----------------------------------------------|--------|-------------------|-----------------------------|------|
| Medicaid                                     | 12,144 | 50.9 (50.3, 51.5) | <b>42.6*** (42.4, 42.9)</b> | 42.6 |
| Medicare                                     | 3,763  | 15.8 (15.3, 16.2) | <b>19.3*** (19.1, 19.5)</b> | 19.3 |
| Commercial                                   | 7,947  | 33.3 (32.7, 33.9) | <b>38.1*** (37.8, 38.3)</b> | 38.1 |
| Missing                                      | 779    | —                 | —                           | —    |
| <b>FQHC<sup>c</sup></b>                      |        |                   |                             |      |
| No                                           | 10,469 | 42.5 (41.9, 43.1) | <b>64.3*** (64.1, 64.5)</b> | 43.3 |
| Yes                                          | 14,164 | 57.5 (56.9, 58.1) | <b>35.7*** (35.5, 35.9)</b> | 56.7 |
| <b>Public housing<sup>d</sup></b>            |        |                   |                             |      |
| No                                           | 19,564 | 88.0 (87.6, 88.5) | <b>89.3*** (89.2, 89.4)</b> | 89.0 |
| Yes                                          | 2,658  | 12.0 (11.5, 12.4) | <b>10.7*** (10.6, 10.8)</b> | 11.0 |
| <b>Area-based poverty<sup>e</sup></b>        |        |                   |                             |      |
| Q1: 0.0%–8.3%                                | 4,703  | 20.1 (19.6, 20.7) | <b>19.4** (19.2, 19.6)</b>  | 21.8 |
| Q2: 8.4%–19.2%                               | 4,663  | 20.0 (19.5, 20.5) | <b>20.6* (20.4, 20.8)</b>   | 21.1 |
| Q3: 19.3%–31.4%                              | 4,663  | 20.0 (19.5, 20.5) | 20.4 (20.3, 20.6)           | 19.7 |
| Q4: 31.5%–43.4%                              | 4,670  | 20.0 (19.5, 20.5) | <b>20.8** (20.6, 20.9)</b>  | 19.0 |
| Q5: 43.5%–75.5%                              | 4,646  | 19.9 (19.4, 20.4) | <b>18.8*** (18.6, 18.9)</b> | 18.3 |
| <b>Area-based race/ethnicity<sup>e</sup></b> |        |                   |                             |      |
| <b>% NHB</b>                                 |        |                   |                             |      |
| Q1: 0.0%–10.8%                               | 4,666  | 20.0 (19.5, 20.5) | <b>23.3*** (23.1, 23.5)</b> | 20.7 |
| Q2: 10.9%–23.4%                              | 4,700  | 20.1 (19.6, 20.7) | <b>22.1*** (21.9, 22.3)</b> | 19.9 |
| Q3: 23.5%–35.5%                              | 4,636  | 19.9 (19.4, 20.4) | <b>18.1*** (17.9, 18.2)</b> | 18.9 |
| Q4: 35.6%–55.9%                              | 4,666  | 20.0 (19.5, 20.5) | <b>17.3*** (17.2, 17.5)</b> | 19.5 |
| Q5: 56.0%–100.0%                             | 4,677  | 20.0 (19.5, 20.6) | <b>19.3** (19.1, 19.4)</b>  | 21.0 |
| <b>% Hispanic</b>                            |        |                   |                             |      |
| Q1: 0.0%–24.8%                               | 4,906  | 21.0 (20.5, 21.5) | <b>24.0*** (23.8, 24.2)</b> | 22.5 |
| Q2: 24.9%–44.7%                              | 4,470  | 19.1 (18.6, 19.7) | <b>18.2*** (18.0, 18.4)</b> | 19.7 |



**Appendix**  
**Social Risks Among Primary Care Patients in a Large Urban Health System**  
**Heller et al.**

|                                                   |        |                      |                                 |      |
|---------------------------------------------------|--------|----------------------|---------------------------------|------|
| Q3: 44.8%–<br>59.2%                               | 4,675  | 20.0 (19.5,<br>20.5) | <b>17.8*** (17.7,<br/>18.0)</b> | 19.7 |
| Q4: 59.3%–<br>70.7%                               | 4,660  | 20.0 (19.5,<br>20.5) | <b>17.7*** (17.5,<br/>17.9)</b> | 19.0 |
| Q5: 70.8%–<br>98.6%                               | 4,634  | 19.9 (19.3,<br>20.4) | <b>22.3*** (22.1,<br/>22.5)</b> | 19.2 |
| <b>Area-based rental<br/>burden<sup>e,f</sup></b> |        |                      |                                 |      |
| <30%                                              | 7,220  | 31.6 (31.0,<br>32.2) | <b>29.2*** (29.0,<br/>29.4)</b> | 32.8 |
| 30%–50%                                           | 12,371 | 54.1 (53.5,<br>54.8) | <b>56.1*** (55.9,<br/>56.3)</b> | 53.3 |
| >50%                                              | 3,268  | 14.3 (13.8,<br>14.8) | 14.6 (14.5, 14.8)               | 13.9 |

*Note:* Boldface indicates statistical significance (\* $p < 0.05$ , \*\* $p < 0.01$ , \*\*\* $p < 0.001$ ).

<sup>a</sup>The comparison population includes all patients (n=205,145) that had a primary care visit at a clinic implementing the screener in April–December 2018.

<sup>b</sup>Weighted by age, race/ethnicity, and insurance status distributions of comparison population.

<sup>c</sup>Indicates that the screener was completed at a Federally Qualified Health Center (FQHC).

<sup>d</sup>Only includes patients who live in New York City.

<sup>e</sup>Area-level measures are at the Census Block Group level. They only include those who were successfully geocoded (n=443 were not geocoded). Residents who were geocoded to block groups with zero population (according to the Census) were excluded from the analysis for this variable.

<sup>f</sup>Rental burden is defined as median gross rent as a percentage of household income in the past 12 months.

NHB, non-Hispanic black; NHW, non-Hispanic white; NHAPI, non-Hispanic Asian/Pacific Islander; NHAIAN, non-Hispanic American Indian/Alaskan Native; Q, quintile.

**Appendix**  
**Social Risks Among Primary Care Patients in a Large Urban Health System**  
Heller et al.

**Appendix Table 4.** Number of SDH Risks Among Montefiore Patients by Patient Characteristics, April–December 2018, Weighted Analyses

| Characteristic | n      | Weighted percent <sup>a</sup> | Weighted percent, <sup>a</sup> % (95% CI) |                           |                          |                          |
|----------------|--------|-------------------------------|-------------------------------------------|---------------------------|--------------------------|--------------------------|
|                |        |                               | Any risk                                  | 1 risk                    | 2 risks                  | ≥3 risks                 |
| Total          | 24,633 | 100.0                         | 19.8 (19.2, 0.0)                          | 10.2 (9.8, 0.0)           | 4.6 (4.3, 0.0)           | 4.9 (4.6, 0.0)           |
| Age, years     |        |                               |                                           |                           |                          |                          |
| 0–5            | 4,884  | 13.5                          | 18.0 (17.0, 19.1)                         | 10.1 (9.2, 10.9)          | 4.0 (3.5, 4.6)           | 3.9 (3.4, 4.5)           |
| 6–11           | 3,036  | 10.8                          | 18.2 (16.8, 19.6)                         | 10.0 (8.9, 11.1)          | <b>3.5* (2.9, 4.2)</b>   | 4.8 (4.0, 5.6)           |
| 12–17          | 2,415  | 9.2                           | 16.9 (15.3, 18.5)                         | 9.3 (8.2, 10.6)           | 3.9 (3.1, 4.9)           | 3.7 (3.0, 4.5)           |
| 18–29 (ref)    | 2,798  | 10.8                          | 18.0 (16.5, 19.6)                         | 9.1 (8.0, 10.3)           | 4.9 (4.1, 5.8)           | 4.1 (3.3, 4.9)           |
| 30–39          | 1,945  | 8.8                           | <b>22.3** (20.3, 24.4)</b>                | <b>11.0* (9.6, 12.7)</b>  | 6.3 (5.1, 7.6)           | 5.0 (4.1, 6.1)           |
| 40–49          | 2,063  | 9.2                           | <b>24.0*** (21.9, 26.2)</b>               | <b>11.0** (9.5, 12.7)</b> | 5.5 (4.5, 6.6)           | <b>7.5*** (6.4, 8.9)</b> |
| 50–59          | 2,656  | 13.7                          | <b>27.3*** (25.3, 29.3)</b>               | 12.1 (10.7, 13.7)         | <b>6.9** (5.8, 8.2)</b>  | <b>8.3*** (7.1, 9.7)</b> |
| 60–69          | 2,461  | 12.2                          | 19.2 (17.5, 21.1)                         | 9.7 (8.5, 11.0)           | 4.4 (3.5, 5.7)           | 5.1 (4.3, 6.2)           |
| ≥70            | 2,375  | 11.8                          | 16.3 (14.8, 17.9)                         | 10.2 (9.0, 11.6)          | <b>3.0*** (2.4, 3.7)</b> | 3.1 (2.4, 4.0)           |
| Sex            |        |                               |                                           |                           |                          |                          |
| Male           | 10,172 | 40.4                          | 19.2 (18.3, 20.1)                         | 9.9 (9.2, 10.5)           | <b>4.2* (3.7, 4.6)</b>   | 5.2 (4.7, 5.7)           |
| Female (ref)   | 14,461 | 59.6                          | 20.1 (19.4, 20.8)                         | 10.3 (9.8, 10.9)          | 4.9 (4.5, 5.3)           | 4.9 (4.5, 5.3)           |
| Race/ethnicity |        |                               |                                           |                           |                          |                          |
| Hispanic (ref) | 8,671  | 48.9                          | 23.3 (22.3, 24.3)                         | 11.6 (10.9, 12.4)         | 5.6 (5.1, 6.2)           | 6.0 (5.5, 6.6)           |
| NHB            | 7,103  | 40.4                          | <b>18.7*** (17.8, 19.7)</b>               | <b>9.5*** (8.8, 10.3)</b> | <b>4.3*** (3.8, 4.9)</b> | <b>4.9** (4.3, 5.5)</b>  |
| NHW            | 944    | 7.5                           | <b>15.7*** (13.3, 18.6)</b>               | <b>8.0** (6.2, 10.3)</b>  | 4.6 (3.1, 6.6)           | <b>3.2*** (2.3, 4.4)</b> |
| NHAPI          | 393    | 2.7                           | <b>13.6*** (10.0, 18.3)</b>               | <b>7.9* (5.1, 11.9)</b>   | 3.5 (2.0, 6.2)           | <b>2.2*** (1.0, 4.8)</b> |
| NHAIAN         | 92     | 0.5                           | 19.9 (13.7, 27.9)                         | 13.2 (9.1, 18.8)          | 4.0 (1.2, 12.5)          | <b>2.7* (1.0, 7.2)</b>   |
| Missing        | 7,430  | —                             | <b>17.5*** (16.5, 18.5)</b>               | <b>9.7*** (8.9, 10.5)</b> | <b>3.8*** (3.3, 4.3)</b> | <b>4.0*** (3.6, 4.5)</b> |

**Appendix**  
**Social Risks Among Primary Care Patients in a Large Urban Health System**  
Heller et al.

|                                       |        |      |                             |                             |                          |                          |
|---------------------------------------|--------|------|-----------------------------|-----------------------------|--------------------------|--------------------------|
| <b>Preferred language</b>             |        |      |                             |                             |                          |                          |
| English (ref)                         | 19,804 | 83.2 | 19.8 (19.1, 20.5)           | 10.2 (9.7, 10.7)            | 4.7 (4.4, 5.2)           | 4.9 (4.6, 5.3)           |
| Spanish                               | 3,274  | 14.3 | <b>24.0** (21.3, 27.0)</b>  | 11.2 (9.8, 12.7)            | 6.6 (4.6, 9.4)           | <b>6.3* (5.2, 7.5)</b>   |
| Other                                 | 651    | 2.5  | <b>13.1*** (10.2, 16.8)</b> | <b>5.2*** (3.0, 8.7)</b>    | <b>5.8* (5.0, 6.8)</b>   | <b>2.1** (1.0, 4.5)</b>  |
| Missing                               | 904    | —    | <b>8.7*** (5.9, 12.6)</b>   | <b>4.6*** (2.5, 8.4)</b>    | <b>0.8*** (0.4, 1.7)</b> | <b>3.3 (2.0, 5.4)</b>    |
| <b>Insurance status</b>               |        |      |                             |                             |                          |                          |
| Medicaid                              | 12,144 | 42.6 | <b>24.9*** (24.2, 25.7)</b> | <b>12.0*** (11.4, 12.6)</b> | <b>5.9*** (5.5, 6.4)</b> | <b>7.0*** (6.6, 7.5)</b> |
| Medicare                              | 3,763  | 19.3 | <b>21.3*** (20.1, 22.7)</b> | <b>11.5*** (10.6, 12.6)</b> | <b>4.6*** (4.0, 5.3)</b> | <b>5.2*** (4.5, 5.9)</b> |
| Commercial (ref)                      | 7,947  | 38.1 | 12.0 (11.3, 12.8)           | 7.0 (6.4, 7.6)              | 2.8 (2.4, 3.2)           | 2.2 (1.9, 2.6)           |
| Missing                               | 779    | —    | <b>24.3*** (21.1, 27.8)</b> | <b>12.6*** (10.2, 15.5)</b> | <b>6.0*** (4.4, 8.2)</b> | <b>5.7*** (4.1, 7.8)</b> |
| <b>FQHC<sup>b</sup></b>               |        |      |                             |                             |                          |                          |
| No (ref)                              | 10,469 | 43.3 | 16.7 (15.9, 17.6)           | 8.8 (8.2, 9.6)              | 3.6 (3.2, 4.1)           | 4.2 (3.8, 4.8)           |
| Yes                                   | 14,164 | 56.7 | <b>22.6*** (21.8, 23.4)</b> | <b>11.6*** (11.0, 12.2)</b> | <b>5.4*** (5.0, 5.9)</b> | <b>5.6*** (5.2, 6.0)</b> |
| <b>Value-based contract</b>           |        |      |                             |                             |                          |                          |
| No (ref)                              | 14,045 | 60.3 | 20.2 (19.5, 21.0)           | 10.4 (9.8, 10.9)            | 4.7 (4.3, 5.1)           | 5.2 (4.8, 5.6)           |
| Yes                                   | 10,588 | 39.7 | 20.0 (18.9, 21.2)           | 9.5 (8.8, 10.2)             | 5.0 (4.2, 5.9)           | 5.5 (5.0, 6.0)           |
| <b>Public housing<sup>c</sup></b>     |        |      |                             |                             |                          |                          |
| No (ref)                              | 19,564 | 89.0 | 19.0 (18.3, 19.6)           | 9.8 (9.3, 10.3)             | 4.5 (4.1, 4.8)           | 4.7 (4.4, 5.0)           |
| Yes                                   | 2,658  | 11.0 | <b>28.0*** (26.0, 30.2)</b> | <b>15.6*** (13.9, 17.5)</b> | <b>6.5*** (5.6, 7.5)</b> | 5.9 (4.8, 7.1)           |
| <b>Area-based poverty<sup>d</sup></b> |        |      |                             |                             |                          |                          |
| Q1: 0.0%–8.3% (ref)                   | 4,703  | 21.8 | 14.6 (13.4, 16.0)           | 7.8 (6.8, 8.9)              | 3.5 (3.0, 4.2)           | 3.3 (2.7, 4.0)           |
| Q2: 8.4%–19.2%                        | 4,663  | 21.1 | <b>18.0*** (16.8, 19.2)</b> | 9.0 (8.2, 9.9)              | <b>4.9** (4.2, 5.7)</b>  | 4.1 (3.5, 4.7)           |
| Q3: 19.3%–31.4%                       | 4,663  | 19.7 | <b>19.7*** (18.5, 21.0)</b> | <b>9.8** (8.9, 10.8)</b>    | <b>4.6* (4.0, 5.2)</b>   | <b>5.4*** (4.8, 6.1)</b> |

**Appendix**  
**Social Risks Among Primary Care Patients in a Large Urban Health System**  
Heller et al.

|                                               |       |      |                             |                             |                          |                          |
|-----------------------------------------------|-------|------|-----------------------------|-----------------------------|--------------------------|--------------------------|
| Q4: 31.5%–43.4%                               | 4,670 | 19.0 | <b>24.2*** (22.6, 25.7)</b> | <b>13.1*** (11.9, 14.3)</b> | <b>5.5*** (4.8, 6.3)</b> | <b>5.6*** (4.8, 6.6)</b> |
| Q5: 43.5%–75.5%                               | 4,646 | 18.3 | <b>25.0*** (23.4, 26.6)</b> | <b>13.1*** (12.0, 14.3)</b> | <b>5.3** (4.5, 6.3)</b>  | <b>6.5*** (5.6, 7.6)</b> |
| <b>Area-based race/ethnicity<sup>d</sup></b>  |       |      |                             |                             |                          |                          |
| <b>% NHB</b>                                  |       |      |                             |                             |                          |                          |
| Q1: 0.0%–10.8% (ref)                          | 4,666 | 20.7 | 19.0 (17.6, 20.5)           | 10.2 (9.1, 11.3)            | 4.0 (3.5, 4.7)           | 4.8 (4.0, 5.7)           |
| Q2: 10.9%–23.4%                               | 4,700 | 19.9 | <b>21.2* (19.8, 22.6)</b>   | 10.7 (9.7, 11.7)            | <b>5.0* (4.3, 5.8)</b>   | 5.5 (4.7, 6.3)           |
| Q3: 23.5%–35.5%                               | 4,636 | 18.9 | <b>21.4* (20.0, 22.8)</b>   | 11.4 (10.4, 12.5)           | 5.0 (4.3, 5.8)           | 5.0 (4.3, 5.7)           |
| Q4: 35.6–55.9%                                | 4,666 | 19.5 | <b>21.5** (20.3, 22.7)</b>  | 11.3 (10.3, 12.4)           | <b>5.4* (4.6, 6.3)</b>   | 4.8 (4.2, 5.4)           |
| Q5: 56.0%–100.0%                              | 4,677 | 21.0 | 18.4 (17.0, 19.9)           | 9.6 (8.6, 10.8)             | 4.3 (3.6, 5.2)           | 4.5 (3.8, 5.3)           |
| <b>% Hispanic</b>                             |       |      |                             |                             |                          |                          |
| Q1: 0.0%–24.8% (ref)                          | 4,906 | 22.5 | 17.5 (16.2, 19.0)           | 9.4 (8.4, 10.5)             | 3.8 (3.2, 4.7)           | 4.3 (3.6, 5.1)           |
| Q2: 24.9%–44.7%                               | 4,470 | 19.7 | 18.0 (16.8, 19.3)           | 9.5 (8.6, 10.5)             | 4.4 (3.8, 5.1)           | 4.1 (3.5, 4.8)           |
| Q3: 44.8%–59.2%                               | 4,675 | 19.7 | <b>20.6** (19.4, 21.9)</b>  | 10.6 (9.6, 11.6)            | <b>4.9* (4.3, 5.7)</b>   | 5.1 (4.5, 5.8)           |
| Q4: 59.3%–70.7%                               | 4,660 | 19.0 | <b>22.2*** (20.8, 23.6)</b> | <b>11.4** (10.4, 12.6)</b>  | <b>5.1* (4.3, 5.9)</b>   | <b>5.7* (4.9, 6.6)</b>   |
| Q5: 70.8%–98.6%                               | 4,634 | 19.2 | <b>23.9*** (22.4, 25.4)</b> | <b>11.7** (10.7, 12.9)</b>  | <b>5.9*** (5.1, 6.8)</b> | <b>6.3** (5.4, 7.3)</b>  |
| <b>Area-based rental burden<sup>d,e</sup></b> |       |      |                             |                             |                          |                          |
| <30% (ref)                                    | 7,220 | 32.8 | 18.0 (17.0, 19.0)           | 9.9 (9.1, 10.7)             | 3.7 (3.2, 4.2)           | 4.4 (3.8, 5.0)           |

**Appendix**  
**Social Risks Among Primary Care Patients in a Large Urban Health System**  
**Heller et al.**

|         |        |      |                             |                   |                          |                        |
|---------|--------|------|-----------------------------|-------------------|--------------------------|------------------------|
| 30%–50% | 12,371 | 53.3 | <b>20.9*** (20.1, 21.8)</b> | 10.7 (10.1, 11.3) | <b>5.0*** (4.6, 5.5)</b> | <b>5.2* (4.8, 5.7)</b> |
| >50%    | 3,268  | 13.9 | <b>20.8** (19.3, 22.5)</b>  | 10.5 (9.3, 11.8)  | <b>5.3** (4.5, 6.3)</b>  | 5.0 (4.2, 5.9)         |

*Note:* Boldface indicates statistical significance (\* $p < 0.05$ , \*\* $p < 0.01$ , \*\*\* $p < 0.001$ ).

<sup>a</sup>Weighted by the age, race/ethnicity, and insurance distributions of the comparison population.

<sup>b</sup>Indicates that the screener was completed at a Federally Qualified Health Center (FQHC).

<sup>c</sup>Only includes patients who live in NYC.

<sup>d</sup>Area-level measures are at the Census Block Group level. They only include those who were successfully geocoded (n=443 were not geocoded). Residents who were geocoded to block groups with zero population (according to the Census) were excluded from the analysis for this variable.

<sup>e</sup>Rental burden is defined as median gross rent as a percentage of household income in the past 12 months.

SDH, social determinants of health; NHB, non-Hispanic black; NHW, non-Hispanic white; NHAPI, non-Hispanic Asian/Pacific Islander; NHAIAN, non-Hispanic American Indian/Alaskan Native; Q, quintile.

**Appendix**  
**Social Risks Among Primary Care Patients in a Large Urban Health System**  
Heller et al.

**Appendix Table 5.** Individual SDH Risks among Montefiore Patients by Patient Characteristics, April–December 2018, Weighted Analyses<sup>a</sup>

| Characteristic | Weighted percent, <sup>a</sup> % (95% CI) |                          |                           |                          |                          |                          |                          |                          |                          |                          |
|----------------|-------------------------------------------|--------------------------|---------------------------|--------------------------|--------------------------|--------------------------|--------------------------|--------------------------|--------------------------|--------------------------|
|                | Housing                                   |                          | Food insecurity           | Access to healthcare     |                          |                          | Utilities cost           | Care need                | Legal                    | Interpersonal violence   |
|                | Quality                                   | Instability              |                           | Health travel            | Health cost              | Getting along            |                          |                          |                          |                          |
| Total          | 6.2 (5.8, 6.5)                            | 4.8 (4.5, 5.1)           | 6.0 (5.7, 6.4)            | 4.6 (4.3, 4.9)           | 4.3 (4.0, 4.6)           | 3.6 (3.4, 3.9)           | 3.2 (3.0, 3.5)           | 2.9 (2.7, 3.2)           | 2.9 (2.7, 3.2)           | 1.5 (1.3, 1.7)           |
| Age, years     |                                           |                          |                           |                          |                          |                          |                          |                          |                          |                          |
| 0–5            | <b>6.2** (5.6, 6.9)</b>                   | 3.4 (2.9, 4.0)           | <b>4.2* (3.6, 4.8)</b>    | 3.8 (3.3, 4.4)           | <b>2.0*** (1.7, 2.5)</b> | <b>1.9*** (1.5, 2.3)</b> | <b>3.0*** (2.6, 3.6)</b> | <b>5.2*** (4.6, 5.9)</b> | <b>3.1** (2.7, 3.7)</b>  | <b>0.8*** (0.6, 1.1)</b> |
| 6–11           | <b>7.4*** (6.5, 8.4)</b>                  | 4.2 (3.5, 4.9)           | 5.5 (4.7, 6.5)            | <b>3.2* (2.6, 3.9)</b>   | <b>2.3*** (1.8, 3.0)</b> | <b>2.1*** (1.6, 2.6)</b> | <b>3.8*** (3.2, 4.5)</b> | <b>3.7** (3.1, 4.5)</b>  | 2.6 (2.1, 3.2)           | 1.2 (0.9, 1.7)           |
| 12–17          | <b>6.2** (5.3, 7.2)</b>                   | 3.5 (2.8, 4.4)           | 5.3 (4.5, 6.3)            | 3.4 (2.7, 4.3)           | <b>2.3*** (1.7, 3.0)</b> | <b>2.4*** (1.8, 3.2)</b> | <b>3.4*** (2.7, 4.2)</b> | 1.9 (1.4, 2.6)           | 2.6 (2.0, 3.5)           | 1.4 (0.9, 2.1)           |
| 18–29 (ref)    | 4.5 (3.7, 5.3)                            | 4.1 (3.4, 5.0)           | 5.3 (4.4, 6.3)            | 4.2 (3.5, 5.1)           | 4.3 (3.6, 5.2)           | 4.9 (4.1, 5.8)           | 1.7 (1.3, 2.3)           | 2.2 (1.7, 2.9)           | 2.0 (1.5, 2.7)           | 1.8 (1.3, 2.3)           |
| 30–39          | <b>6.2* (5.2, 7.5)</b>                    | <b>5.8* (4.8, 7.1)</b>   | 6.4 (5.3, 7.6)            | 4.6 (3.8, 5.7)           | 5.6 (4.5, 6.9)           | 5.9 (4.9, 7.2)           | <b>3.4*** (2.7, 4.4)</b> | <b>3.5* (2.7, 4.5)</b>   | 2.7 (2.0, 3.6)           | 1.9 (1.3, 2.7)           |
| 40–49          | <b>6.7** (5.6, 8.0)</b>                   | <b>6.7*** (5.5, 8.0)</b> | <b>8.6*** (7.4, 10.0)</b> | 5.4 (4.4, 6.5)           | <b>6.2* (5.0, 7.6)</b>   | 6.3 (5.1, 7.7)           | <b>5.0*** (4.0, 6.2)</b> | 1.9 (1.4, 2.5)           | <b>4.0*** (3.2, 5.1)</b> | 2.1 (1.6, 2.8)           |
| 50–59          | <b>8.8*** (7.5, 10.2)</b>                 | <b>7.9*** (6.7, 9.2)</b> | <b>9.7*** (8.4, 11.2)</b> | <b>7.9*** (6.7, 9.3)</b> | <b>7.5*** (6.2, 8.9)</b> | 5.4 (4.4, 6.5)           | <b>4.9*** (4.0, 6.0)</b> | 2.5 (1.9, 3.3)           | <b>4.7*** (3.7, 5.8)</b> | 2.7 (2.0, 3.6)           |
| 60–69          | 5.6 (4.8, 6.7)                            | <b>5.7* (4.6, 7.0)</b>   | 6.2 (5.3, 7.4)            | <b>6.0* (4.9, 7.4)</b>   | 4.7 (3.8, 5.8)           | <b>3.3** (2.6, 4.2)</b>  | 2.3 (1.8, 3.0)           | 2.2 (1.6, 2.9)           | 2.6 (2.0, 3.3)           | 1.3 (1.0, 1.8)           |

**Appendix**  
**Social Risks Among Primary Care Patients in a Large Urban Health System**  
Heller et al.

|                           |                             |                             |                             |                             |                             |                             |                             |                             |                             |                             |
|---------------------------|-----------------------------|-----------------------------|-----------------------------|-----------------------------|-----------------------------|-----------------------------|-----------------------------|-----------------------------|-----------------------------|-----------------------------|
| ≥70                       | 4.2 (3.5, 5.1)              | 3.2 (2.6, 4.0)              | 4.4 (3.6, 5.4)              | 3.9 (3.2, 4.7)              | 3.9 (3.1, 4.9)              | <b>2.1***</b><br>(1.6, 2.7) | 1.7 (1.3, 2.3)              | 2.7 (2.1, 3.4)              | 2.4 (1.8, 3.2)              | <b>0.9**</b> (0.6, 1.4)     |
| <b>Sex</b>                |                             |                             |                             |                             |                             |                             |                             |                             |                             |                             |
| Male                      | 5.7 (5.2, 6.2)              | <b>5.4* (4.9, 5.9)</b>      | 6.2 (5.7, 6.7)              | 4.5 (4.1, 5.0)              | 4.2 (3.8, 4.8)              | 3.4 (3.0, 3.9)              | 3.1 (2.7, 3.5)              | 2.8 (2.5, 3.2)              | <b>3.3* (3.0, 3.8)</b>      | 1.4 (1.2, 1.7)              |
| Female (ref)              | 6.4 (6.0, 6.8)              | 4.6 (4.2, 5.0)              | 6.0 (5.6, 6.5)              | 4.6 (4.3, 5.0)              | 4.3 (3.9, 4.7)              | 3.8 (3.4, 4.2)              | 3.3 (3.0, 3.6)              | 2.9 (2.7, 3.3)              | 2.7 (2.5, 3.0)              | 1.5 (1.3, 1.8)              |
| <b>Race/ethnicity</b>     |                             |                             |                             |                             |                             |                             |                             |                             |                             |                             |
| Hispanic (ref)            | 7.8 (7.2, 8.4)              | 6.1 (5.5, 6.6)              | 7.5 (6.9, 8.1)              | 5.9 (5.3, 6.4)              | 5.3 (4.8, 6.0)              | 4.1 (3.7, 4.6)              | 3.9 (3.4, 4.3)              | 3.3 (2.9, 3.7)              | 3.4 (3.0, 3.8)              | 1.8 (1.5, 2.1)              |
| NHB                       | <b>5.5***</b><br>(5.0, 6.1) | <b>4.7**</b><br>(4.2, 5.3)  | <b>5.6***</b><br>(5.0, 6.2) | <b>4.0***</b><br>(3.6, 4.6) | <b>4.2**</b><br>(3.7, 4.8)  | 3.8 (3.3, 4.3)              | 3.6 (3.1, 4.1)              | <b>2.7*</b><br>(2.3, 3.1)   | 3.1 (2.7, 3.6)              | <b>1.1**</b> (0.9, 1.4)     |
| NHW                       | <b>3.3***</b><br>(2.3, 4.7) | <b>3.9**</b><br>(2.6, 5.7)  | <b>4.3***</b><br>(3.3, 5.7) | <b>4.3* (3.0, 5.9)</b>      | 3.7 (2.4, 5.6)              | 3.3 (2.3, 4.8)              | <b>1.8***</b><br>(1.1, 2.8) | <b>1.5***</b><br>(0.9, 2.4) | <b>1.7**</b><br>(1.0, 3.0)  | 2.5 (1.5, 4.0)              |
| NHAPI                     | <b>2.2***</b><br>(1.0, 4.9) | <b>1.5***</b><br>(0.5, 4.4) | <b>4.4* (2.4, 7.8)</b>      | <b>2.9**</b><br>(1.5, 5.6)  | 3.7 (2.2, 6.4)              | <b>0.9***</b><br>(0.4, 2.3) | <b>1.1***</b><br>(0.5, 2.4) | 2.0 (0.9, 4.7)              | 3.4 (1.8, 6.3)              | <b>0.2***</b><br>(0.0, 1.5) |
| NHAIAN                    | <b>1.5***</b><br>(0.6, 3.7) | 5.4 (2.0, 13.5)             | <b>3.2** (1.2, 8.1)</b>     | 4.1 (1.5, 11.0)             | 6.2 (4.7, 8.2)              | 4.0 (1.2, 12.4)             | <b>1.5**</b><br>(0.6, 3.7)  | 2.1 (0.7, 5.9)              | 2.3 (0.9, 5.7)              | <b>0.4**</b> (0.1, 2.7)     |
| Missing                   | <b>5.6***</b><br>(5.1, 6.2) | <b>3.7***</b><br>(3.3, 4.2) | <b>5.1***</b><br>(4.5, 5.7) | <b>3.7***</b><br>(3.3, 4.2) | <b>3.1***</b><br>(2.7, 3.6) | <b>3.0***</b><br>(2.5, 3.5) | <b>2.4***</b><br>(2.1, 2.8) | 3.1 (2.7, 3.5)              | <b>2.3***</b><br>(2.0, 2.7) | 1.4 (1.1, 1.7)              |
| <b>Preferred language</b> |                             |                             |                             |                             |                             |                             |                             |                             |                             |                             |
| English (ref)             | 6.2 (5.8, 6.6)              | 4.7 (4.3, 5.0)              | 5.8 (5.4, 6.3)              | 4.5 (4.2, 4.9)              | 4.4 (4.1, 4.8)              | 4.0 (3.7, 4.3)              | 3.5 (3.1, 3.8)              | 2.8 (2.6, 3.1)              | 2.9 (2.7, 3.2)              | 1.6 (1.4, 1.8)              |
| Spanish                   | <b>7.4* (6.5, 8.5)</b>      | <b>6.6***</b><br>(5.6, 7.6) | <b>8.2***</b><br>(7.0, 9.6) | <b>7.3* (5.2, 10.2)</b>     | 5.9 (3.8, 8.9)              | <b>3.0* (2.4, 3.8)</b>      | <b>2.8 (2.3, 3.5)</b>       | <b>3.8*</b><br>(3.1, 4.7)   | 3.2 (2.4, 4.3)              | 1.7 (1.2, 2.3)              |

**Appendix**  
**Social Risks Among Primary Care Patients in a Large Urban Health System**  
Heller et al.

|                                   |                             |                             |                             |                             |                                  |                             |                                |                                |                                 |                                   |
|-----------------------------------|-----------------------------|-----------------------------|-----------------------------|-----------------------------|----------------------------------|-----------------------------|--------------------------------|--------------------------------|---------------------------------|-----------------------------------|
| Other                             | <b>3.0***</b><br>(1.7, 5.4) | <b>1.8***</b><br>(0.8, 3.6) | 7.0 (5.4,<br>8.9)           | <b>0.8***</b><br>(0.4, 1.4) | <b>1.5***</b><br>(0.6, 3.8)      | <b>0.9***</b><br>(0.3, 3.1) | <b>0.9***</b><br>(0.3,<br>2.9) | <b>1.5**</b><br>(0.9,<br>2.6)  | <b>8.7***</b><br>(6.4,<br>11.7) | <b>0.1***</b><br>(0.0, 0.3)       |
| Missing                           | <b>2.8***</b><br>(1.9, 4.1) | <b>1.1***</b><br>(0.5, 2.3) | <b>2.4** (0.8,</b><br>6.7)  | <b>2.1**</b><br>(1.0, 4.7)  | <b>2.1***</b><br>(1.6, 2.8)      | <b>0.5***</b><br>(0.2, 1.1) | <b>1.8***</b><br>(1.6,<br>2.1) | 2.3 (1.1,<br>4.9)              | 1.9 (0.8,<br>4.5)               | <b>0.3***</b><br>(0.1, 0.8)       |
| <b>Insurance</b>                  |                             |                             |                             |                             |                                  |                             |                                |                                |                                 |                                   |
| Medicaid                          | <b>8.3***</b><br>(7.9, 8.9) | <b>6.7***</b><br>(6.2, 7.2) | <b>8.2***</b><br>(7.7, 8.7) | <b>6.4***</b><br>(6.0, 6.9) | <b>4.1***</b><br>(3.7, 4.5)      | <b>4.3***</b><br>(4.0, 4.7) | <b>4.6***</b><br>(4.2,<br>4.9) | <b>4.4***</b><br>(4.1,<br>4.8) | <b>4.2***</b><br>(3.8, 4.6)     | <b>2.0***</b><br>(1.7, 2.2)       |
| Medicare                          | <b>6.6***</b><br>(5.9, 7.4) | <b>5.2***</b><br>(4.6, 5.9) | <b>6.6***</b><br>(5.9, 7.4) | <b>6.1***</b><br>(5.4, 6.9) | <b>5.2***</b><br>(4.6, 6.0)      | 3.3 (2.8,<br>3.9)           | <b>2.7**</b><br>(2.3,<br>3.3)  | <b>2.8***</b><br>(2.3,<br>3.4) | <b>2.8***</b><br>(2.3, 3.4)     | <b>2.0***</b><br>(1.6, 2.5)       |
| Commercial                        | 3.7 (3.3,<br>4.1)           | 2.1 (1.8,<br>2.4)           | 3.1 (2.7,<br>3.5)           | 1.5 (1.2,<br>1.8)           | 2.8 (2.4,<br>3.2)                | 2.8 (2.4,<br>3.2)           | 1.8 (1.6,<br>2.2)              | 1.5 (1.3,<br>1.8)              | 1.2 (1.0,<br>1.5)               | 0.8 (0.6,<br>1.1)                 |
| Missing                           | 5.4 (3.9,<br>7.5)           | <b>6.5***</b><br>(4.8, 8.8) | <b>7.1***</b><br>(5.4, 9.3) | <b>5.6***</b><br>(4.0, 7.7) | <b>8.6***</b><br>(6.6,<br>11.2)  | 4.3 (3.0,<br>6.2)           | <b>3.7*</b><br>(2.5,<br>5.5)   | 2.2 (1.3,<br>3.7)              | <b>4.2***</b><br>(2.9, 6.0)     | 1.0 (0.5,<br>2.2)                 |
| <b>FQHC<sup>b</sup></b>           |                             |                             |                             |                             |                                  |                             |                                |                                |                                 |                                   |
| No (ref)                          | 4.6 (4.1,<br>5.2)           | 4.1 (3.6,<br>4.7)           | 4.7 (4.2,<br>5.3)           | 3.8 (3.4,<br>4.4)           | 3.5 (3.0,<br>4.1)                | 3.8 (3.4,<br>4.2)           | 2.5 (2.1,<br>2.8)              | 2.6 (2.2,<br>3.0)              | 2.3 (2.0,<br>2.7)               | 1.5 (1.3,<br>1.8)                 |
| Yes                               | <b>7.4***</b><br>(6.9, 7.9) | <b>5.5***</b><br>(5.1, 6.0) | <b>7.1***</b><br>(6.7, 7.6) | <b>5.3***</b><br>(4.9, 5.7) | <b>5.0***</b><br>(4.6, 5.5)      | 3.6 (3.3,<br>4.0)           | <b>3.9***</b><br>(3.5,<br>4.2) | <b>3.2*</b><br>(2.9,<br>3.5)   | <b>3.4***</b><br>(3.1, 3.8)     | 1.5 (1.3,<br>1.7)                 |
| <b>Value-based contract</b>       |                             |                             |                             |                             |                                  |                             |                                |                                |                                 |                                   |
| No (ref)                          | 6.3 (5.9,<br>6.8)           | 4.9 (4.5,<br>5.3)           | 6.3 (5.8,<br>6.7)           | 4.6 (4.2,<br>5.0)           | 4.2 (3.8,<br>4.6)                | 3.8 (3.5,<br>4.2)           | 3.3 (3.0,<br>3.7)              | 3.1 (2.8,<br>3.4)              | 3.3 (3.0,<br>3.7)               | 1.7 (1.5,<br>1.9)                 |
| Yes                               | 7.1 (6.4,<br>7.8)           | 4.7 (4.1,<br>5.4)           | 5.9 (5.2,<br>6.6)           | 4.6 (4.0,<br>5.2)           | <b>5.2* (4.5,</b><br><b>5.9)</b> | 3.8 (3.1,<br>4.5)           | 3.0 (2.6,<br>3.5)              | <b>4.0***</b><br>(3.6,<br>4.5) | <b>2.4***</b><br>(2.0, 2.8)     | <b>1.2** (1.0,</b><br><b>1.4)</b> |
| <b>Public housing<sup>c</sup></b> |                             |                             |                             |                             |                                  |                             |                                |                                |                                 |                                   |



**Appendix**  
**Social Risks Among Primary Care Patients in a Large Urban Health System**  
Heller et al.

|                                              |                                       |                                    |                                    |                                    |                                   |                                   |                                   |                |                                    |                        |
|----------------------------------------------|---------------------------------------|------------------------------------|------------------------------------|------------------------------------|-----------------------------------|-----------------------------------|-----------------------------------|----------------|------------------------------------|------------------------|
| No (ref)                                     | 5.3 (5.0, 5.7)                        | 4.8 (4.5, 5.2)                     | 5.8 (5.5, 6.2)                     | 4.3 (4.0, 4.6)                     | 4.2 (3.8, 4.5)                    | 3.5 (3.3, 3.8)                    | 3.4 (3.1, 3.7)                    | 2.9 (2.6, 3.1) | 2.8 (2.6, 3.1)                     | 1.5 (1.3, 1.7)         |
| Yes                                          | <b>14.6***</b><br><b>(12.9, 16.4)</b> | 5.2 (4.2, 6.5)                     | 6.8 (5.8, 8.1)                     | <b>5.9**</b><br><b>(4.9, 7.0)</b>  | <b>5.3*</b> (4.3, 6.5)            | <b>5.3**</b><br><b>(4.3, 6.3)</b> | <b>2.3**</b><br><b>(1.7, 3.1)</b> | 3.4 (2.7, 4.3) | 3.2 (2.5, 4.0)                     | 1.6 (1.0, 2.4)         |
| <b>Area-based poverty<sup>d</sup></b>        |                                       |                                    |                                    |                                    |                                   |                                   |                                   |                |                                    |                        |
| Q1: 0%–8.3% (ref)                            | 3.2 (2.6, 3.9)                        | 2.7 (2.2, 3.3)                     | 3.7 (3.1, 4.4)                     | 3.2 (2.6, 3.9)                     | 3.4 (2.8, 4.2)                    | 3.2 (2.6, 3.8)                    | 2.5 (1.9, 3.3)                    | 2.9 (2.2, 3.7) | 2.0 (1.6, 2.5)                     | 1.2 (0.9, 1.7)         |
| Q2: 8.4%–19.2%                               | <b>4.6**</b> (4.0, 5.4)               | <b>4.8***</b><br><b>(4.2, 5.5)</b> | <b>5.3**</b> (4.7, 6.0)            | 3.8 (3.3, 4.5)                     | 4.5* (3.8, 5.3)                   | 3.5 (3.0, 4.1)                    | 3.2 (2.7, 3.9)                    | 2.4 (2.0, 2.8) | 2.5 (2.1, 3.0)                     | 1.3 (1.0, 1.7)         |
| Q3: 19.3%–31.4%                              | <b>5.6***</b><br><b>(5.0, 6.2)</b>    | <b>5.0***</b><br><b>(4.4, 5.8)</b> | <b>6.6***</b><br><b>(5.9, 7.4)</b> | <b>4.7***</b><br><b>(4.2, 5.4)</b> | 4.2 (3.7, 4.9)                    | 3.4 (2.9, 4.1)                    | <b>3.9**</b><br><b>(3.4, 4.6)</b> | 3.0 (2.5, 3.5) | <b>2.8*</b> (2.4, 3.4)             | <b>1.9*</b> (1.6, 2.3) |
| Q4: 31.5%–43.4%                              | <b>8.2***</b><br><b>(7.2, 9.3)</b>    | <b>6.0***</b><br><b>(5.1, 7.0)</b> | <b>7.6***</b><br><b>(6.7, 8.6)</b> | <b>6.1***</b><br><b>(5.3, 7.1)</b> | <b>4.8*</b> (3.9, 5.8)            | 4.0 (3.3, 4.9)                    | <b>3.4*</b><br><b>(2.8, 4.2)</b>  | 3.4 (2.9, 4.0) | <b>3.2**</b><br><b>(2.7, 3.8)</b>  | 1.5 (1.2, 2.0)         |
| Q5: 43.5%–75.5%                              | <b>10.1***</b><br><b>(9.0, 11.3)</b>  | <b>5.7***</b><br><b>(4.8, 6.6)</b> | <b>7.0***</b><br><b>(6.0, 8.0)</b> | <b>5.4***</b><br><b>(4.7, 6.3)</b> | <b>5.0**</b><br><b>(4.1, 6.0)</b> | <b>4.9**</b><br><b>(4.0, 5.9)</b> | <b>3.9**</b><br><b>(3.2, 4.8)</b> | 3.4 (2.8, 4.2) | <b>3.5***</b><br><b>(2.9, 4.1)</b> | 1.7 (1.3, 2.4)         |
| <b>Area-based race/ethnicity<sup>d</sup></b> |                                       |                                    |                                    |                                    |                                   |                                   |                                   |                |                                    |                        |
| % NHB                                        | 5.1 (4.4, 5.9)                        | 4.3 (3.7, 5.0)                     | 6.3 (5.4, 7.3)                     | 5.1 (4.3, 6.0)                     | 4.2 (3.4, 5.0)                    | 3.6 (2.9, 4.5)                    | 3.3 (2.7, 4.1)                    | 2.9 (2.4, 3.6) | 2.6 (2.0, 3.4)                     | 1.5 (1.1, 1.9)         |
| Q1: 0%–10.8% (ref)                           | <b>6.9**</b> (6.1, 7.8)               | 5.0 (4.3, 5.9)                     | 6.2 (5.5, 7.0)                     | 5.0 (4.3, 5.7)                     | 4.1 (3.4, 4.9)                    | 3.6 (3.0, 4.3)                    | 4.2 (3.5, 5.0)                    | 3.0 (2.5, 3.6) | 3.4 (2.8, 4.2)                     | 2.0 (1.6, 2.5)         |
| Q2: 10.9%–23.4%                              | <b>7.0***</b><br><b>(6.2, 7.9)</b>    | 5.3 (4.5, 6.1)                     | 6.4 (5.6, 7.2)                     | 5.1 (4.3, 5.9)                     | 4.9 (4.2, 5.8)                    | 4.1 (3.4, 4.8)                    | 3.0 (2.5, 3.7)                    | 2.6 (2.2, 3.0) | 2.6 (2.1, 3.1)                     | 1.5 (1.1, 2.0)         |
| Q3: 23.5%–35.5%                              | <b>7.2***</b><br><b>(6.5, 8.1)</b>    | 5.1 (4.4, 6.0)                     | 5.8 (5.2, 6.5)                     | 5.0 (4.2, 5.8)                     | 4.6 (3.8, 5.4)                    | 3.5 (3.0, 4.1)                    | 3.3 (2.8, 3.9)                    | 2.9 (2.5, 3.4) | 3.1 (2.6, 3.6)                     | 1.3 (1.0, 1.7)         |

**Appendix**  
**Social Risks Among Primary Care Patients in a Large Urban Health System**  
Heller et al.

|                                         |                              |                             |                              |                              |                   |                            |                              |                            |                   |                             |
|-----------------------------------------|------------------------------|-----------------------------|------------------------------|------------------------------|-------------------|----------------------------|------------------------------|----------------------------|-------------------|-----------------------------|
| Q4:<br>35.6%–<br>55.9%                  | 5.5 (4.6,<br>6.4)            | 4.3 (3.5,<br>5.2)           | <b>5.1* (4.4,<br/>5.9)</b>   | 4.1 (3.4,<br>4.8)            | 4.0 (3.2,<br>4.9) | 3.7 (3.1,<br>4.4)          | 3.2 (2.6,<br>3.9)            | 3.0 (2.4,<br>3.6)          | 2.9 (2.3,<br>3.6) | 1.1 (0.8,<br>1.5)           |
| Q5:<br>56.0%–<br>100%                   | 5.1 (4.4,<br>5.9)            | 4.3 (3.7,<br>5.0)           | 6.3 (5.4,<br>7.3)            | 5.1 (4.3,<br>6.0)            | 4.2 (3.4,<br>5.0) | 3.6 (2.9,<br>4.5)          | 3.3 (2.7,<br>4.1)            | 2.9 (2.4,<br>3.6)          | 2.6 (2.0,<br>3.4) | 1.5 (1.1,<br>1.9)           |
| % Hispanic                              |                              |                             |                              |                              |                   |                            |                              |                            |                   |                             |
| Q1: 0%–<br>24.8%<br>(ref)               | 4.9 (4.1,<br>5.9)            | 3.9 (3.2,<br>4.7)           | 4.4 (3.8,<br>5.1)            | 3.8 (3.2,<br>4.5)            | 4.3 (3.5,<br>5.2) | 3.3 (2.7,<br>4.0)          | 2.9 (2.4,<br>3.6)            | 2.8 (2.2,<br>3.5)          | 2.7 (2.1,<br>3.3) | 1.3 (0.9,<br>1.7)           |
| Q2:<br>24.9%–<br>44.7%                  | 5.4 (4.8,<br>6.2)            | 3.9 (3.3,<br>4.6)           | 5.1 (4.4,<br>5.9)            | 4.2 (3.5,<br>5.0)            | 3.7 (3.0,<br>4.4) | 3.6 (3.0,<br>4.2)          | 2.9 (2.4,<br>3.6)            | 3.2 (2.6,<br>3.8)          | 2.7 (2.3,<br>3.2) | 1.1 (0.9,<br>1.5)           |
| Q3:<br>44.8%–<br>59.2%                  | <b>6.8** (6.1,<br/>7.6)</b>  | <b>5.3** (4.6,<br/>6.2)</b> | <b>6.1*** (5.4,<br/>6.8)</b> | 4.7 (4.0,<br>5.5)            | 4.4 (3.7,<br>5.1) | 3.3 (2.8,<br>3.9)          | 3.2 (2.7,<br>3.8)            | 2.5 (2.1,<br>3.0)          | 3.0 (2.5,<br>3.7) | 1.3 (1.0,<br>1.7)           |
| Q4:<br>59.3%–<br>70.7%                  | <b>7.7*** (6.8,<br/>8.7)</b> | <b>5.5** (4.7,<br/>6.4)</b> | <b>7.1*** (6.2,<br/>8.1)</b> | <b>5.3** (4.6,<br/>6.2)</b>  | 4.5 (3.8,<br>5.4) | 4.3 (3.6,<br>5.1)          | 3.6 (3.0,<br>4.3)            | 2.7 (2.3,<br>3.3)          | 3.4 (2.8,<br>4.0) | <b>2.2** (1.7,<br/>2.8)</b> |
| Q5:<br>70.8%–<br>98.6%                  | <b>7.7*** (6.8,<br/>8.7)</b> | <b>5.6** (4.9,<br/>6.4)</b> | <b>7.7*** (6.8,<br/>8.8)</b> | <b>6.0*** (5.2,<br/>6.9)</b> | 5.3 (4.4,<br>6.3) | <b>4.5* (3.7,<br/>5.4)</b> | <b>4.1* (3.4,<br/>5.0)</b>   | <b>3.8* (3.1,<br/>4.6)</b> | 3.2 (2.6,<br>3.8) | <b>2.1** (1.7,<br/>2.7)</b> |
| Area-based rental burden <sup>d,e</sup> |                              |                             |                              |                              |                   |                            |                              |                            |                   |                             |
| <30% (ref)                              | 6.1 (5.3,<br>7.1)            | 4.1 (3.5,<br>4.7)           | 5.2 (4.6,<br>5.8)            | 3.8 (3.3,<br>4.3)            | 3.9 (3.3,<br>4.5) | 3.6 (3.1,<br>4.1)          | 2.3 (1.9,<br>2.8)            | 3.1 (2.6,<br>3.7)          | 2.5 (2.1,<br>3.0) | 1.5 (1.2,<br>1.9)           |
| 30%–50%                                 | 6.5 (6.0,<br>7.0)            | <b>5.1** (4.7,<br/>5.6)</b> | <b>6.5*** (6.0,<br/>7.0)</b> | <b>5.2*** (4.8,<br/>5.7)</b> | 4.5 (4.1,<br>5.0) | 3.6 (3.3,<br>4.0)          | <b>3.6*** (3.2,<br/>4.0)</b> | 2.9 (2.6,<br>3.2)          | 3.0 (2.7,<br>3.4) | 1.6 (1.3,<br>1.8)           |
| >50%                                    | 6.1 (5.5,<br>6.8)            | <b>5.6* (4.6,<br/>6.8)</b>  | 6.1 (5.3,<br>7.0)            | 4.4 (3.7,<br>5.2)            | 4.0 (3.3,<br>4.8) | 3.6 (2.9,<br>4.3)          | <b>4.3*** (3.5,<br/>5.2)</b> | 2.7 (2.2,<br>3.3)          | 2.9 (2.3,<br>3.7) | 1.5 (1.2,<br>2.0)           |

Note: Boldface indicates statistical significance (\* $p$ <0.05, \*\* $p$ <0.01, \*\*\* $p$ <0.001).

**Appendix**  
**Social Risks Among Primary Care Patients in a Large Urban Health System**  
**Heller et al.**

<sup>a</sup>Weighted by age, race/ethnicity, and insurance distributions of the comparison population.

<sup>b</sup>Indicates that the screener was completed at a Federally Qualified Health Center (FQHC).

<sup>c</sup>Only includes patients who live in NYC.

<sup>d</sup>Area-level measures are at the Census Block Group level. They only include those who were successfully geocoded (n=443 were not geocoded). Residents who were geocoded to block groups with zero population (according to the Census) were excluded from the analysis for this variable.

<sup>e</sup>Rental burden is defined as median gross rent as a percentage of household income in the past 12 months.

SDH, social determinants of health; NHB, non-Hispanic black; NHW, non-Hispanic white; NHAPI, non-Hispanic Asian/Pacific Islander; NHAIAN, non-Hispanic American Indian/Alaskan Native; Q, quintile.

**Appendix**  
**Social Risks Among Primary Care Patients in a Large Urban Health System**  
**Heller et al.**

**Appendix Table 6.** Number of SDH Risks Among Montefiore Patients by Targeted Screening Group,<sup>a</sup> April–December 2018

| <b>Risk</b> | <b>n</b> | <b>%</b>          | <b>Any risk, % (95% CI)</b> | <b>1 risk, % (95% CI)</b> | <b>2 risks, % (95% CI)</b> | <b>≥3 risks, % (95% CI)</b> |
|-------------|----------|-------------------|-----------------------------|---------------------------|----------------------------|-----------------------------|
| Normal risk | 18,365   | 74.6 (74.1, 75.2) | 18.2 (17.7, 18.8)           | 9.7 (9.3, 10.1)           | 4.1 (3.8, 4.4)             | 4.4 (4.1, 4.7)              |
| Higher risk | 6,244    | 25.4 (24.8, 25.9) | 25.2 (24.2, 26.3)           | 12.2 (11.4, 13.0)         | 6.1 (5.5, 6.7)             | 6.9 (6.3, 7.6)              |

<sup>a</sup>Targeted screening group determined at departmental level; higher risk refers to clinics that screened patients who were recently discharged, had recent emergency department visits, or were social work patients, for example.

SDH, social determinants of health.

**Appendix**  
**Social Risks Among Primary Care Patients in a Large Urban Health System**  
**Heller et al.**

**Appendix Table 7.** Individual SDH Risks Among Montefiore Patients by Targeted Screening Group,<sup>a</sup> April–December 2018

| Risk        | Housing                |                            | Access to healthcare           |                              |                            |                              |                               |                          |                      |                                       |
|-------------|------------------------|----------------------------|--------------------------------|------------------------------|----------------------------|------------------------------|-------------------------------|--------------------------|----------------------|---------------------------------------|
|             | Quality, %<br>(95% CI) | Instability, %<br>(95% CI) | Food insecurity, %<br>(95% CI) | Health travel, %<br>(95% CI) | Health cost, %<br>(95% CI) | Getting along, %<br>(95% CI) | Utilities cost, %<br>(95% CI) | Care need, %<br>(95% CI) | Legal, %<br>(95% CI) | Interpersonal violence, %<br>(95% CI) |
| Normal risk | 6.3 (5.9, 6.6)         | 4.2 (3.9, 4.5)             | 5.3 (5.0, 5.6)                 | 3.9 (3.7, 4.2)               | 3.1 (2.8, 3.3)             | 2.7 (2.5, 3.0)               | 3.2 (2.9, 3.4)                | 3.3 (3.1, 3.6)           | 2.6 (2.4, 2.8)       | 1.3 (1.1, 1.4)                        |
| Higher risk | 7.2 (6.5, 7.8)         | 6.6 (6.0, 7.2)             | 8.5 (7.9, 9.3)                 | 6.9 (6.3, 7.5)               | 6.1 (5.6, 6.8)             | 5.9 (5.4, 6.6)               | 3.9 (3.5, 4.4)                | 3.1 (2.7, 3.6)           | 4.2 (3.8, 4.8)       | 2.2 (1.9, 2.6)                        |

<sup>a</sup>Targeted screening group determined at departmental level; higher risk refers to clinics that screened patients who were recently discharged, had recent emergency department visits, or were social work patients, for example.

SDH, social determinants of health.
